# Supplementary material
Source: Springer Nature journal article supplement (https://www.springermedizin.de/resource/supplementary/12906_2011_1039_MOESM4_ESM.pdf/9520304)

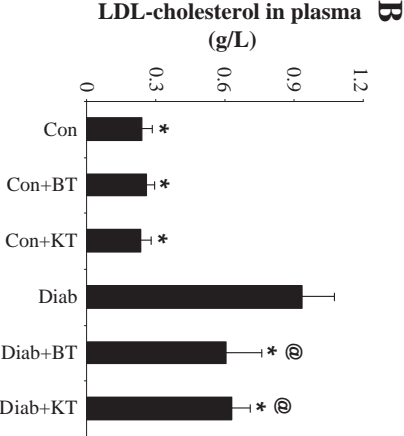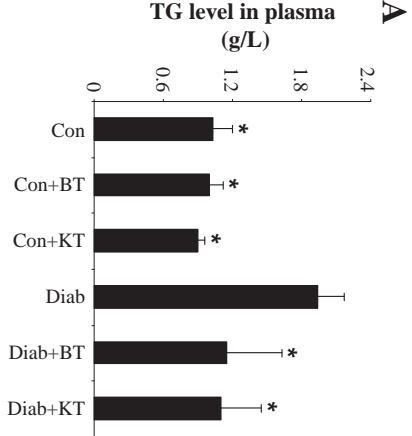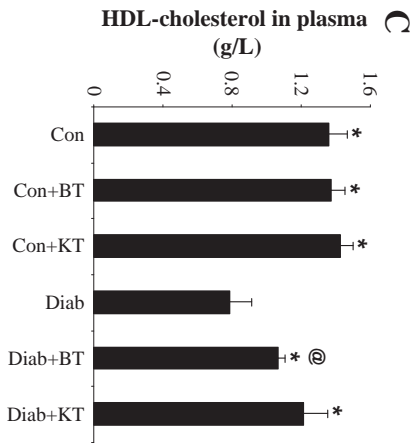

Supplement: MOESM4 [file 9520304]
